# Supplementary material for: Spatially resolved metabolic distribution for unraveling the physiological change and responses in tomato fruit using matrix-assisted laser desorption/ionization–mass spectrometry imaging (MALDI–MSI)
Source: PubMed Central journal article supplement (PMC5306346; doi:10.1007/s00216-016-0118-4), 2016-12-08
Supplement: 216_2016_118_MOESM1_ESM.pdf [file 216_2016_118_MOESM1_ESM.pdf]

## **Analytical and Bioanalytical Chemistry**

### **Electronic Supplementary Material**

#### **Spatially resolved metabolic distribution for unraveling the physiological change and responses in tomato fruit using matrix-assisted laser desorption/ionization–mass spectrometry imaging (MALDI–MSI)**

Junya Nakamura, Tomomi Morikawa-Ichinose, Yoshinori Fujimura, Eisuke Hayakawa,  
Katsutoshi Takahashi, Takanori Ishii, Daisuke Miura, Hiroyuki Wariishi

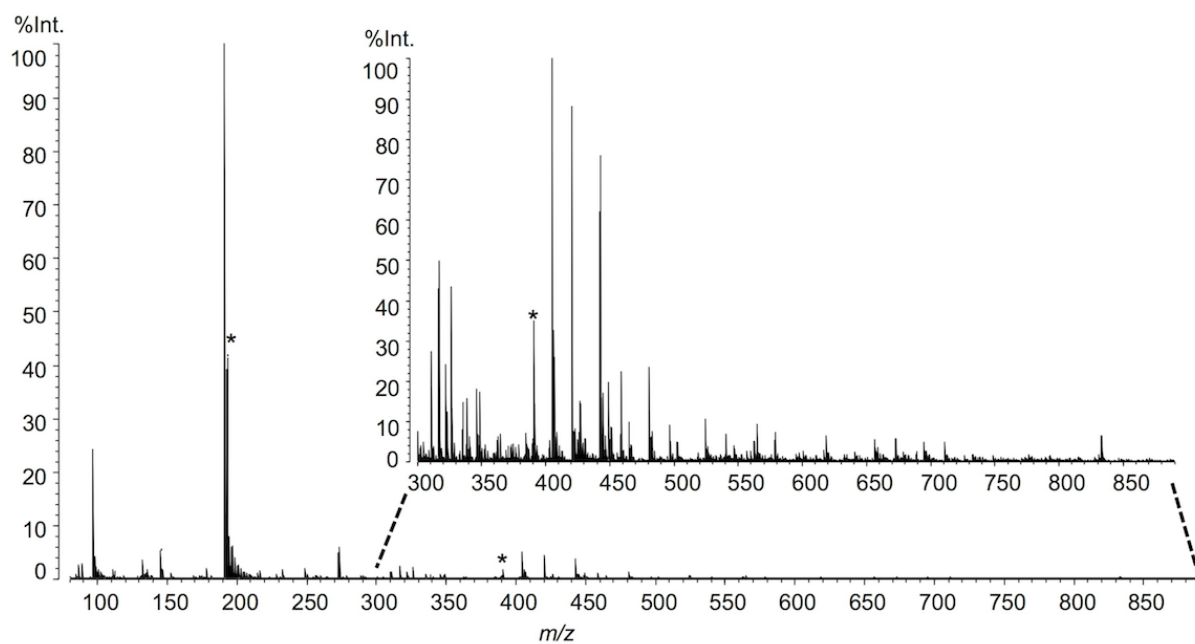

**Fig. S1** Overview of the averaged mass spectrum acquired from the direct analysis of MR tomato fruit thin section. Whole averaged mass spectrum acquired from MR tomato thin-sections ( $m/z = 80-890$ ). Enlarged spectra from whole averaged mass spectra data ( $m/z = 300-890$ ). Asterisk marks; matrix-derived peaks (matrix: 9-AA)

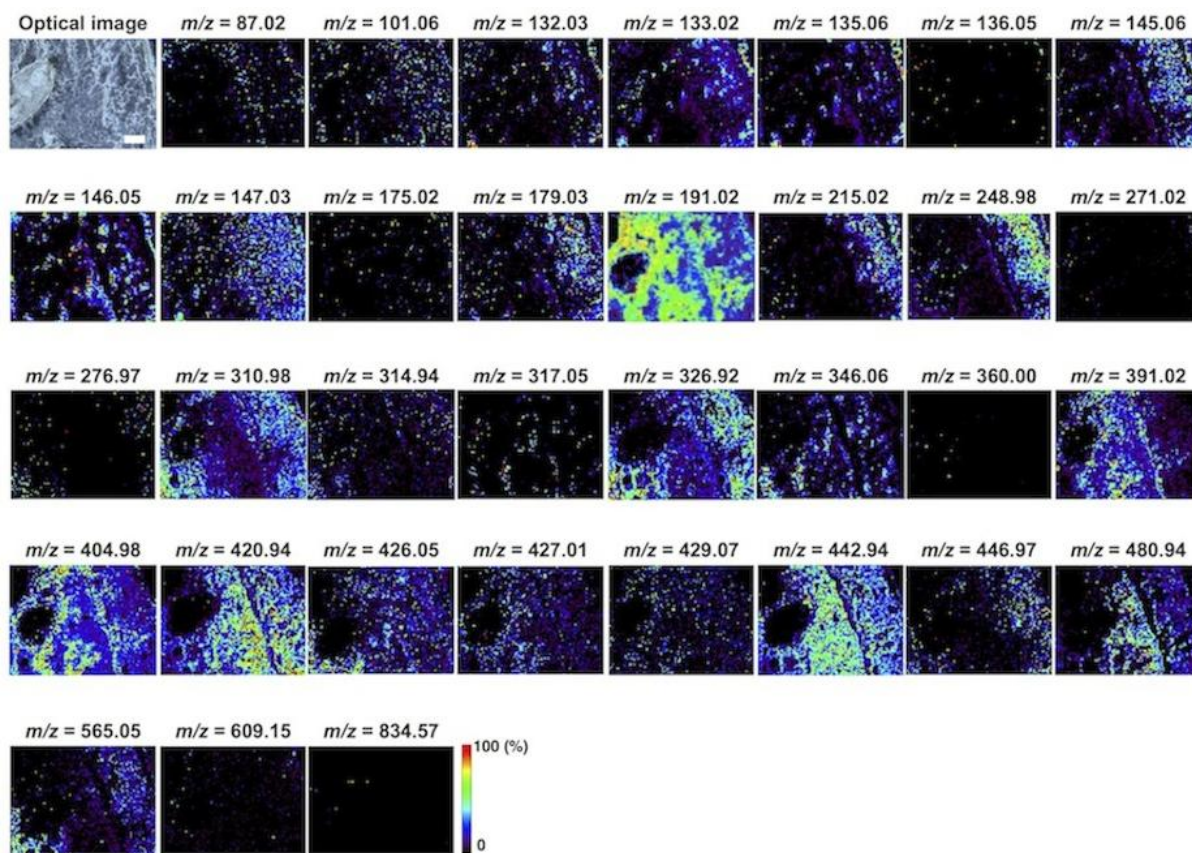

**Fig. S2** In situ compounds imaging of MR tomato fruit section. Visualization of unique distributions of 34 compounds derived from metabolites in the MR tomato fruit section. Scale bar = 1.0 mm

**Table S1** Mass-to-charge ratio, molecular species and fragmentations observed on the tomato fruit section

| <i>m/z</i> | <i>Molecular species</i> | <i>Fragments observed</i> | <i>Formula</i>                                                                |
|------------|--------------------------|---------------------------|-------------------------------------------------------------------------------|
| 87         | pyruvate                 | 44                        | C <sub>3</sub> H <sub>4</sub> O <sub>3</sub>                                  |
| 132        | aspartate                | 115, 88                   | C <sub>4</sub> H <sub>7</sub> NO <sub>4</sub>                                 |
| 133        | malate                   | 115                       | C <sub>4</sub> H <sub>6</sub> O <sub>5</sub>                                  |
| 145        | glutamine                | 127                       | C <sub>5</sub> H <sub>10</sub> N <sub>2</sub> O <sub>3</sub>                  |
| 146        | glutamate                | 128, 102                  | C <sub>5</sub> H <sub>8</sub> NO <sub>4</sub>                                 |
| 147        | citramalate              | 129, 101, 87              | C <sub>5</sub> H <sub>8</sub> O <sub>5</sub>                                  |
| 179        | caffeate                 | 135                       | C <sub>9</sub> H <sub>8</sub> O <sub>4</sub>                                  |
| 191        | citrate                  | 173, 111                  | C <sub>6</sub> H <sub>8</sub> O <sub>7</sub>                                  |
| 346        | AMP                      | 211, 151, 97              | C <sub>10</sub> H <sub>14</sub> N <sub>5</sub> O <sub>7</sub> P               |
| 565        | UDP-glucose              | 403, 323                  | C <sub>15</sub> H <sub>24</sub> N <sub>2</sub> O <sub>17</sub> P <sub>2</sub> |

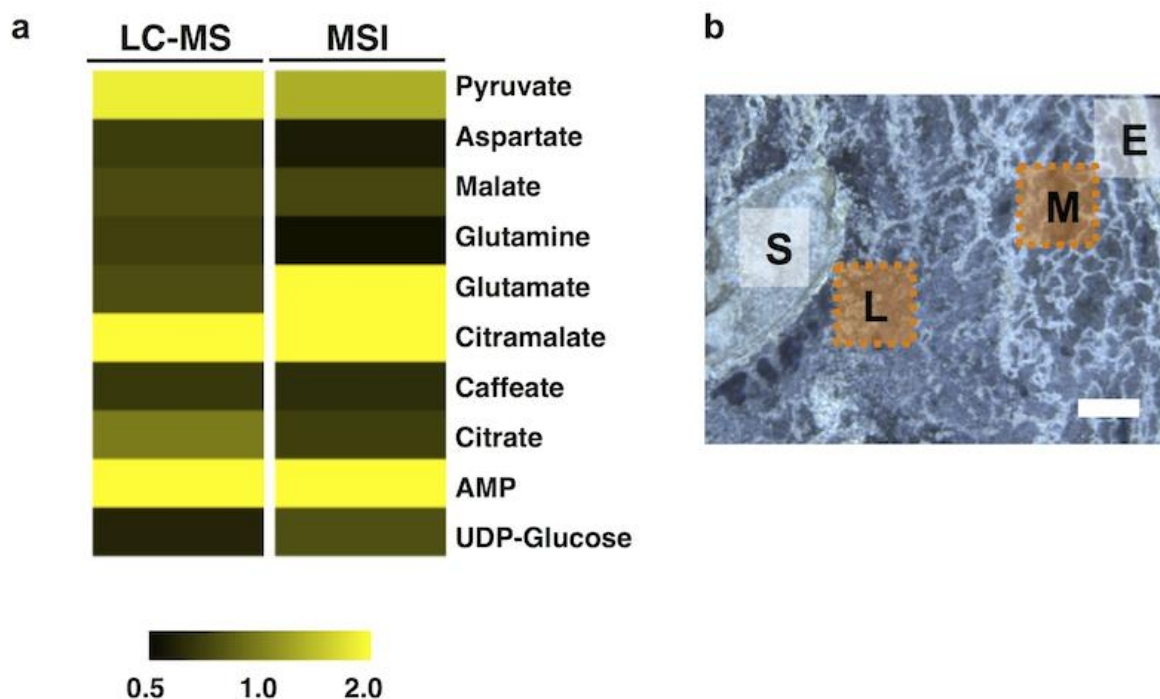

**Fig. S3** A comparison of the average concentration/intensity between the whole tissue regions and partial tissue regions. **a** In the heat map, 10 common metabolites ratio detected by LC-MS and MSI. The ratio of the average intensity (locule/pericarp) in LC-MS data (left column). The ratio of the average intensity (locule/mesocarp) obtained from ROIs (L) and (M), which are indicated in the panel **b**, in MALDI-MSI data (right column). **b** Optical image of thin-section of the MR tomato fruit. E; epicarp, M; mesocarp, L; locule, S; seed. Scale bar = 1.0 mm

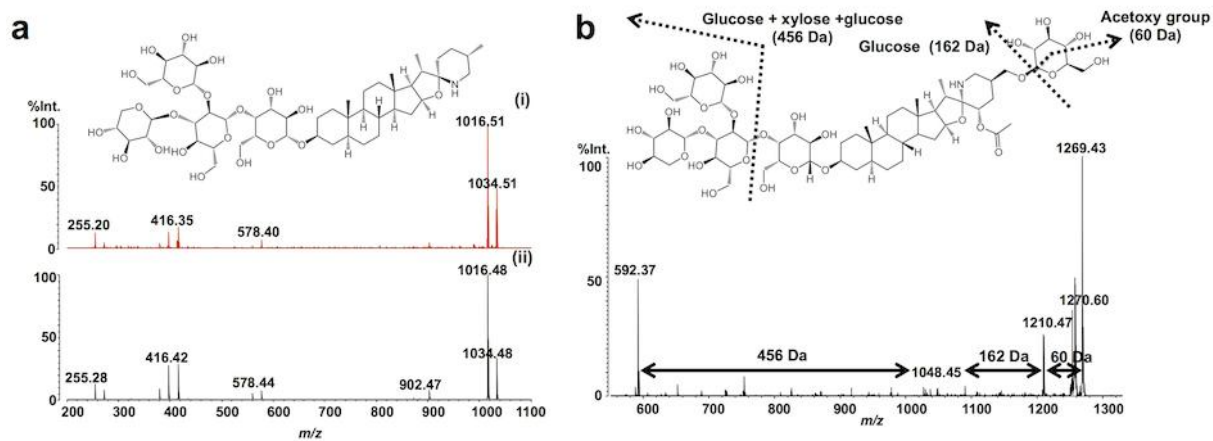

**Fig. S4** Identification or estimation of compounds derived from glycoalkaloids by comparing with MS/MS data. **a** Identification of MS peaks of  $m/z = 1034.55$  ( $[M+H]^+$ ) as tomatine by comparing with MS/MS spectra between tomato fruit section and standard compound. (i) The MS/MS spectrum acquired from the tomato fruit section. (ii) The MS/MS spectrum of tomatine acquired from standard sample. **b** Estimation of MS peaks of  $m/z = 1270.60$  ( $[M+H]^+$ ) as esculoside A by MS/MS data. The fragments were referred from [25]
